# Supplementary material
Source: PubMed Central journal article supplement (PMC2840487)
Supplement: 0913460107_pnas.200913460SI.pdf [file 0913460107_pnas.200913460SI.pdf]

# Supporting Information

Allakhverdiev et al. 10.1073/pnas.0913460107

## SI Materials and Methods

Redox titration was performed under anaerobic conditions (under argon) in a reaction mixture [5 mL;  $\sim 8 \mu\text{g}$  chlorophyll (Chl)  $\cdot\text{mL}^{-1}$ ] containing 50 mM Mes (pH 7.0), 10 mM NaCl, 2 mM  $\text{MgCl}_2$ , 5 mM  $\text{CaCl}_2$ , and 0.04%  $\beta$ -D-dodecyl maltoside in the presence of 1,1'-trimethylene-2,2'-dipyridinium dibromide (2  $\mu\text{M}$ ;  $E_{m7} = -552$  mV), sodium dithionite (50–100  $\mu\text{M}$ ;  $E_{m7} = -530$  mV), methyl viologen (2  $\mu\text{M}$ ;  $E_{m7} = -440$  mV), benzyl viologen (2  $\mu\text{M}$ ;  $E_{m7} = -311$  mV), or indigo disulfonate (2  $\mu\text{M}$ ;  $E_{m7} = -125$  mV). For potentials lower than  $-550$  mV, the concentrations of sodium dithionite, 1,1'-trimethylene-2,2'-dipyridinium dibromide, and indigo disulfonate were increased to 150–200  $\mu\text{M}$ , 5  $\mu\text{M}$ , and 5  $\mu\text{M}$ , respectively, and neutral red (up to 20  $\mu\text{M}$ ;  $E_{m7} = -325$  mV) was added gradually. The presence of these redox mediators produced an  $E_m = -628$  mV and did not change the pH of the medium. However, to further lower the oxidation potential, we changed the pH of the medium from 7.0 to 7.3. At a low concentration of sodium dithionite, redox equilibrium was reached slowly. After titrations in the reducing direction, reoxidation was performed several times on the same samples. Oxidative titrations were performed by gradual addition

of potassium ferricyanide (up to 100  $\mu\text{M}$ ;  $E_{m7} = 430$  mV). Most titrations were performed from low to high potential, and the dark relaxation time interval between measurements at two different potentials was 10–15 min. Each sample was used for two to four different measurements of potential in the reducing or oxidizing direction for a total of at least 20 data points.

The light-induced absorption changes of pheophytin (Phe) *a* were monitored using a Hitachi U-0080D photodiode array spectrophotometer at 25 °C at different ambient redox potentials. Actinic light from a halogen lamp (150 W) was used for illumination through a glass fiber using a blue (Corning 4–96) or red filter (R-60; Toshiba), and the intensities of the actinic light were 900 and 1,600  $\mu\text{mol photons m}^{-2}\cdot\text{s}^{-1}$ , respectively. Additional red or blue filters were placed before the photodiode, as needed. The intensity of measuring light was 4  $\mu\text{mol photons m}^{-2}\cdot\text{s}^{-1}$ . The light-induced difference spectra were obtained by subtraction of the spectra of illuminated samples from the spectra of control (dark) samples. The intensity of the actinic light was saturated, and the sample was illuminated for 15 s to avoid a possible photoinhibition (1).

1. Nikitishena OV, Smolova TN, Khatypov RA, Shkuropatov AJ, Klimov VV (2002) A new pathway of photoinactivation of photosystem II: Irreversible photoreduction of

pheophytin causes loss of photochemical activity of isolated D1/D2/Cyt *b*559 complex. *Biochemistry (Mosc)* 67:364–371.



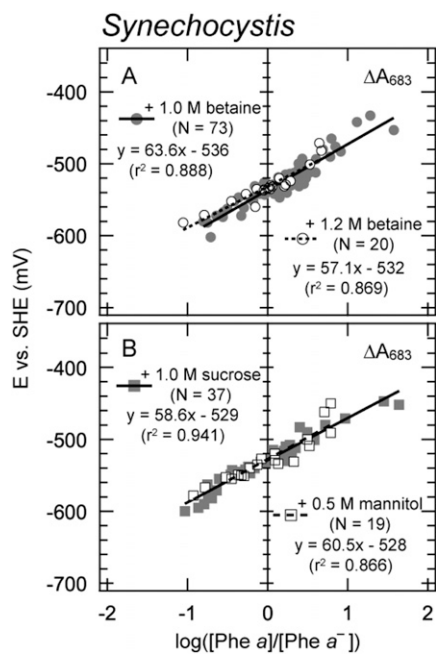

**Fig. 53.** Effect of stabilizers on the redox potentials of Phe *a* in PS II complexes isolated from *Synechocystis*. The effect of betaine (1.0 M and 1.2 M), sucrose (1.0 M), and mannitol (0.5 M) on the redox potentials of Phe *a* was shown by the titration curves. Detection wavelengths are indicated in the upper right of each panel. *N*, number of data points;  $r^2$ , correlation coefficient.

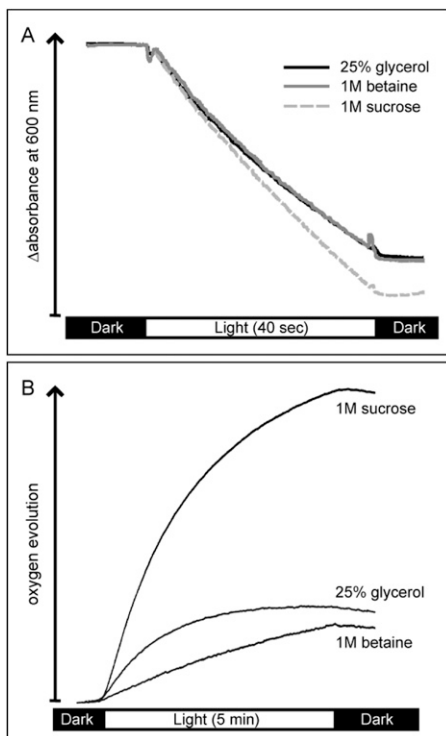

**Fig. 54.** Effect on betaine on dichlorophenol indophenol photoreduction in the presence of diphenyl carbazide (DPC–DCIP) (A) and oxygen evolution (B) in PS II complexes isolated from *Synechocystis*. DPC–DCIP photoreduction was monitored by the changes in absorbance at 600 nm. Betaine (1.0 M) and 25% glycerol gave identical traces, indicating that both reagents did not induce any acceleration in the rate of DPC–DCIP photoreduction, but sucrose enhanced the rate by ~10%. Sucrose (1.0 M) enhanced the initial rate of  $O_2$  evolution by ~250%; however, betaine (1.0 M) did not enhance the initial rate. In contrast, the rate of  $O_2$  evolution remained constant for up to 5 min of illumination in the presence of betaine, but the initial rate was saturated within 2 min of illumination in the presence of sucrose and glycerol (25%). These results indicate that the sites at which betaine and sucrose interact with PS II may differ.
